# Supplementary material for: Solvent and Intermediate Phase as Boosters for the Perovskite Transformation and Solar Cell Performance
Source: PubMed Central journal article supplement (PMC4860713; doi:10.1038/srep25648), 2016-05-09
Supplement: srep25648-s1.pdf [file srep25648-s1.pdf]

# Solvent and Intermediate Phase as Boosters for the Perovskite Transformation and Solar Cell Performance

*Jinhyun Kim, Taehyun Hwang, Sangheon Lee, Byungho Lee, Jaewon Kim, Gil Su Jang,*

*Seunghoon Nam, and Byungwoo Park\**

WCU Hybrid Materials Program, Department of Materials Science and Engineering,

Research Institute of Advanced Materials,

Seoul National University, Seoul 08826, Korea

| Device | Iso-propanol | RXN 1 | RXN 2  | RXN 3 | RXN 4 |
|--------|--------------|-------|--------|-------|-------|
| 1      | 5.89%        | 8.87% | 9.95%  | 6.95% | 4.40% |
| 2      | 5.87%        | 9.51% | 11.00% | 7.32% | 4.03% |
| 3      | 5.53%        | 9.43% | 10.12% | 7.31% | 4.16% |
| 4      | 5.84%        | 8.07% | 11.19% | 6.29% | 3.76% |
| 5      | 5.91%        | 8.76% | 10.10% | 6.87% | 4.23% |
| 6      | 5.31%        | 8.50% | 10.10% | 6.94% | 4.24% |
| 7      | 5.23%        | 8.55% | 11.24% | 6.44% | 3.80% |
| 8      | 5.15%        | 9.09% | 10.00% | 6.51% | 3.83% |
| 9      | 6.30%        | 8.55% | 12.30% | 6.67% | 3.62% |
| 10     | 5.86%        | 9.09% | 11.80% | 7.29% | 4.58% |

**Supplementary Table 1.** Power conversion efficiencies of MAPbI<sub>3</sub> perovskite solar cells from the reactions 1, 2, 3, 4, and iso-propanol.

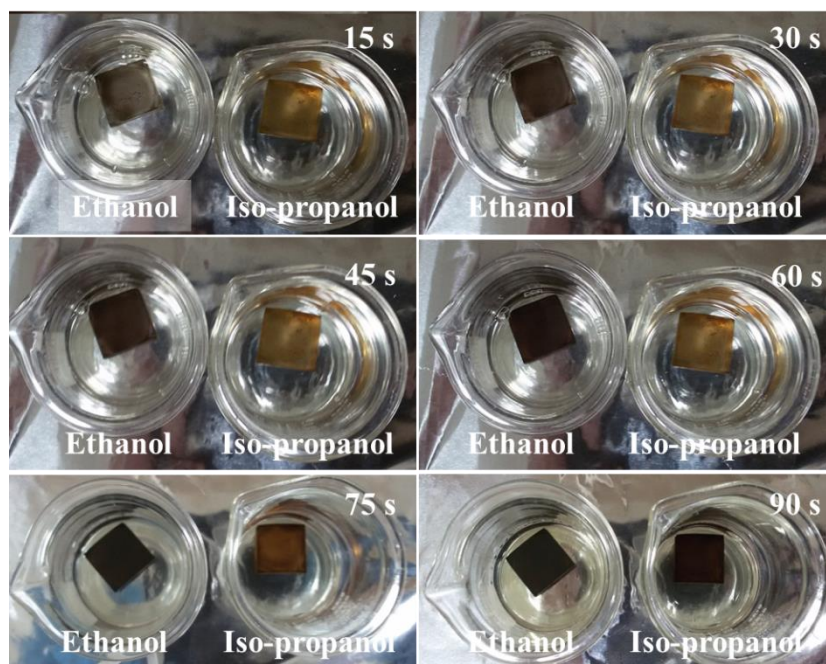

**Supplementary Figure 1.** Time-dependent optical variation for the  $\text{PbCl}_2$  films in the MAI/ethanol or MAI/iso-propanol solution.

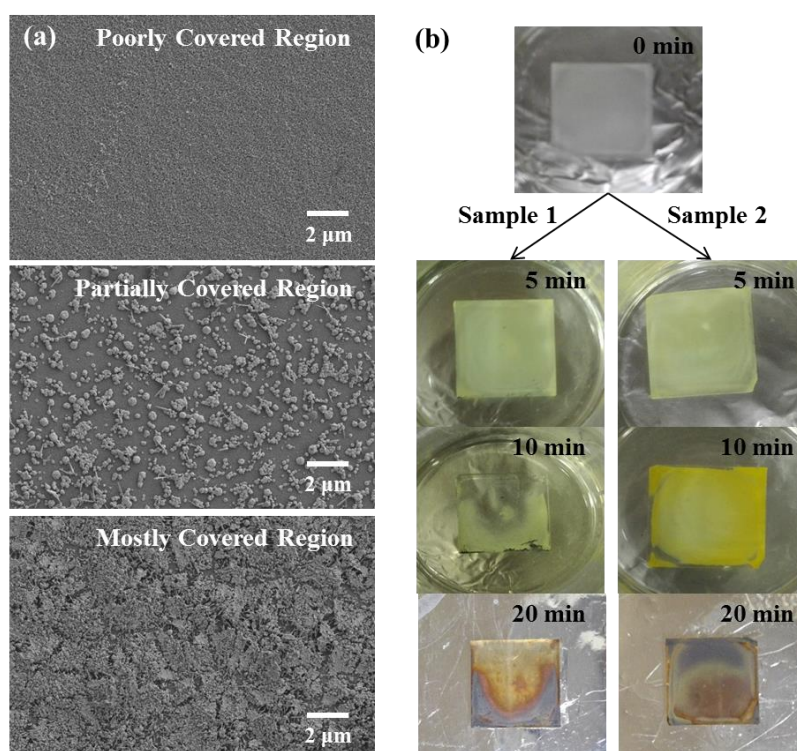

**Supplementary Figure 2.**  $\text{MAPbI}_3$  conversion using a methanol solvent: (a) SEM images for the  $\text{MAPbI}_3$  film in different regions (20-min dipping sample), and (b) optical observations in every 5 min.

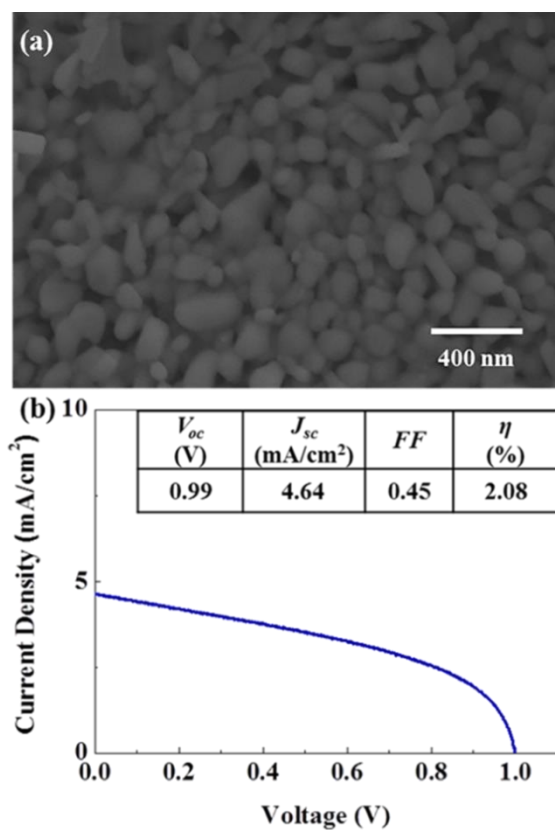

**Supplementary Figure 3.** SEM images of (a) MAPbI<sub>3</sub> and (b) *J*-*V* curve from the 20-mg/mL MAI/iso-propanol solution.

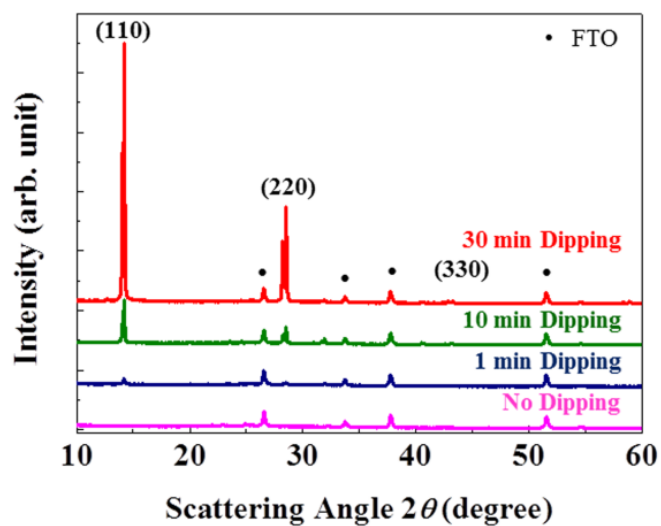

**Supplementary Figure 4.** X-ray diffraction from various MAI/ethanol dipping times on the PbCl<sub>2</sub> film.

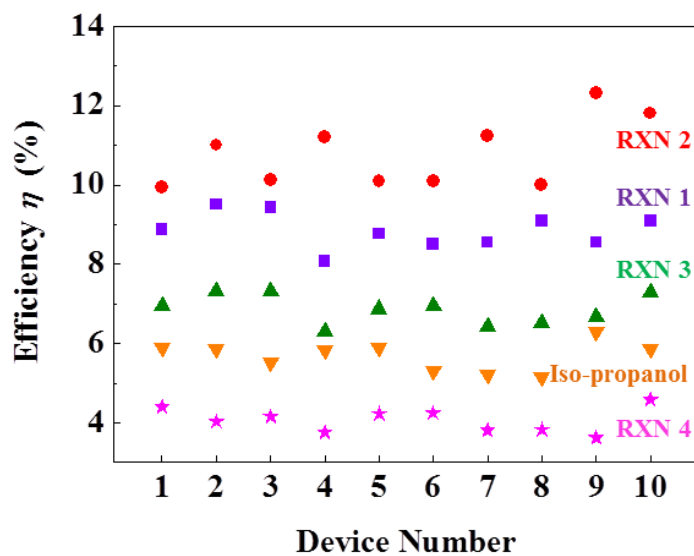

**Supplementary Figure 5.** Device reproducibility of MAPbI<sub>3</sub> perovskite solar cells from the reactions 1, 2, 3, 4, and iso-propanol.

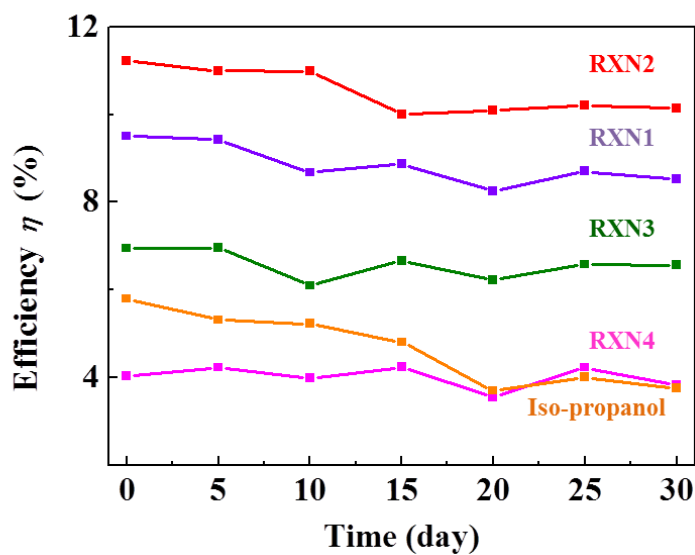

**Supplementary Figure 6.** Stability of MAPbI<sub>3</sub> perovskite solar cells from the reactions 1, 2, 3, and 4 for 30 days. The corresponding data by iso-propanol (RXN 1) are also shown.

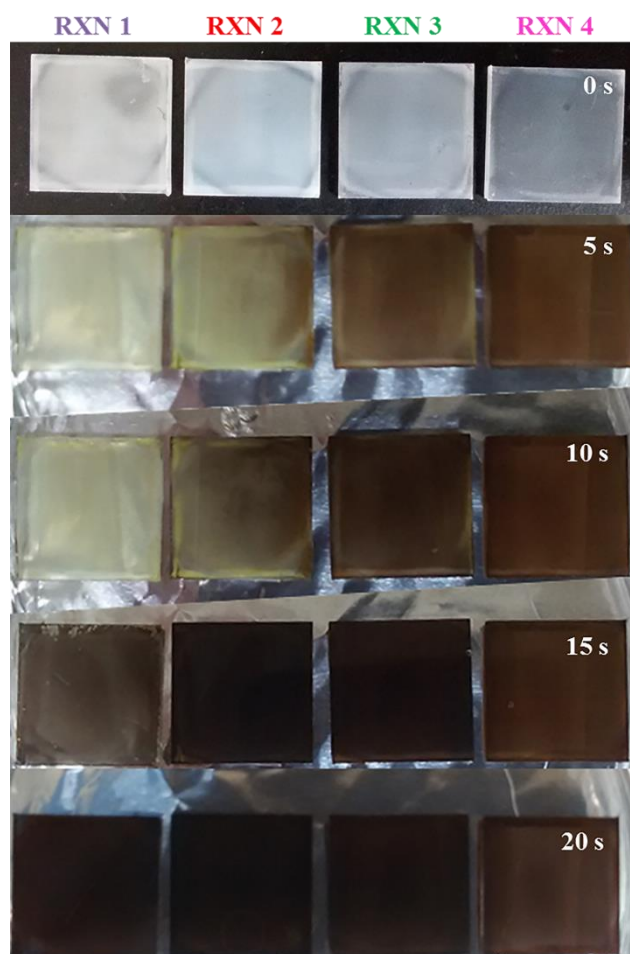

**Supplementary Figure 7.** Time-dependent optical variation for the reactions 1, 2, 3, and 4 in a MAI/ethanol solution.
